# Supplementary material for: Long-lived fluorinated boron-nitride dots exhibiting room-temperature phosphorescence and high-temperature resistance
Source: Royal Society of Chemistry journal article supplement (doi:10.1039/d3ce00286a), 2023-01-01
Supplement: d3ce00286a1.pdf [file d3ce00286a1.pdf]

## Electronic Supplementary Information

### **Long-lived fluorinated boron-nitride dots exhibiting room-temperature phosphorescence and high-temperature resistance**

Xu Zhang,<sup>a</sup> Shenghui Han,<sup>a</sup> Gang Lian,<sup>\*a</sup> Deliang Cui<sup>a</sup> and Qilong Wang<sup>b</sup>

- a. State Key Lab of Crystal Materials, Shandong University, Jinan 250100, P.R. China.
- b. Key Laboratory for Special Functional Aggregated Materials of Education Ministry, School of Chemistry & Chemical Engineering, Shandong University, Jinan 250100, P.R. China.

email: liangang@sdu.edu.cn

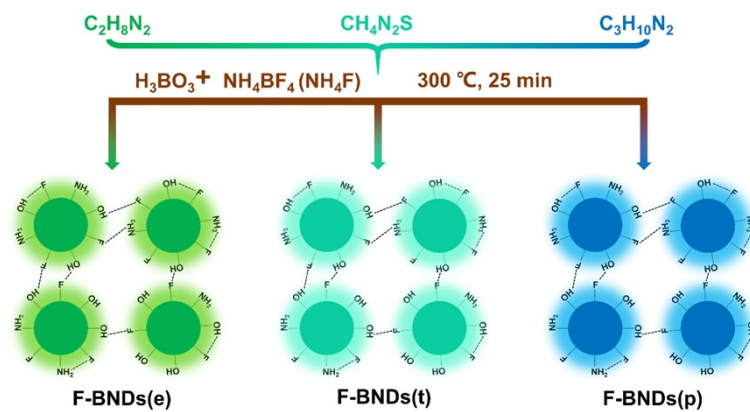

**Fig. S1** Synthetic procedures of F-BNDs(e), F-BNDs(t) and F-BNDs(p).

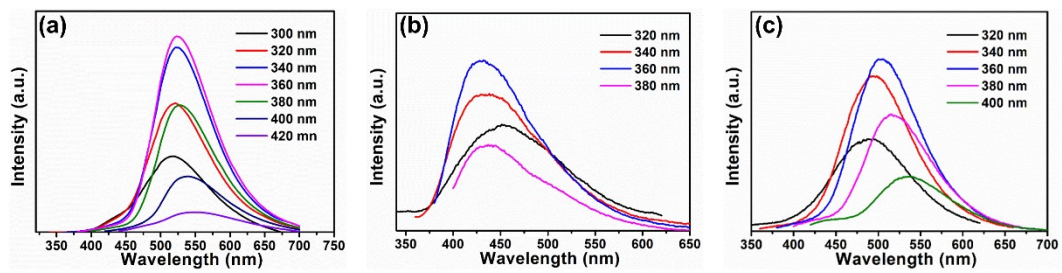

**Fig. S2** The phosphorescence emission spectra excited at different wavelengths of (a) F-BNDs(e), (b) F-BNDs(p) and (c) F-BNDs(t).

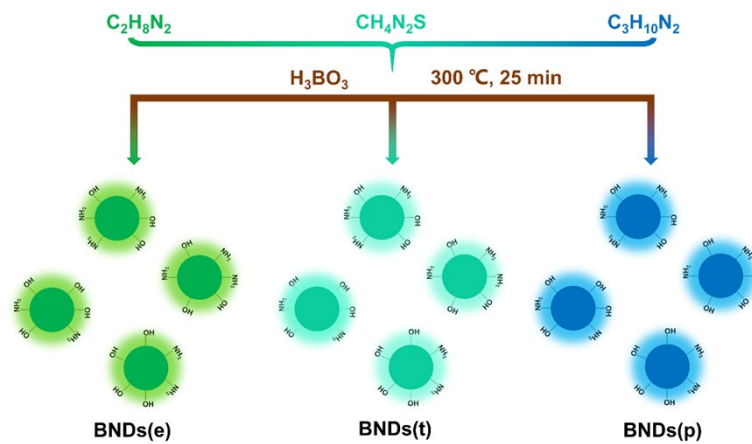

**Fig. S3** Synthetic procedures of BNDs(e), BNDs(t) and BNDs(p).

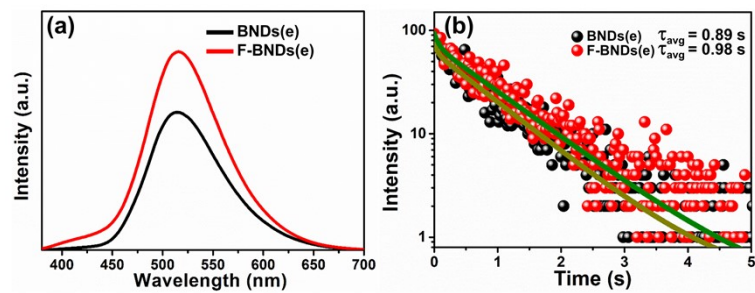

**Fig. S4** (a) The phosphorescence emission spectra of F-BNDs(e) and BNDs(e) under 360 nm excitation. (b) Time-resolved phosphorescence decay curves of F-BNDs(e) and BNDs(e) under 360 nm excitation.

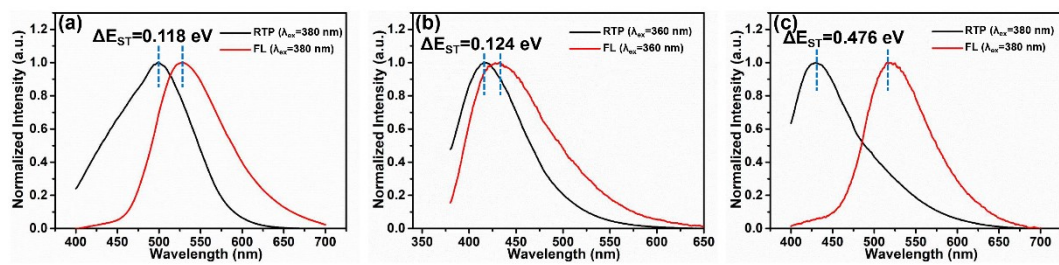

**Fig. S5** FL and phosphorescence spectra excited at 360 nm of (a) F-BNDs(e), (b) F-BNDs(p) and (c) F-BNDs(t).

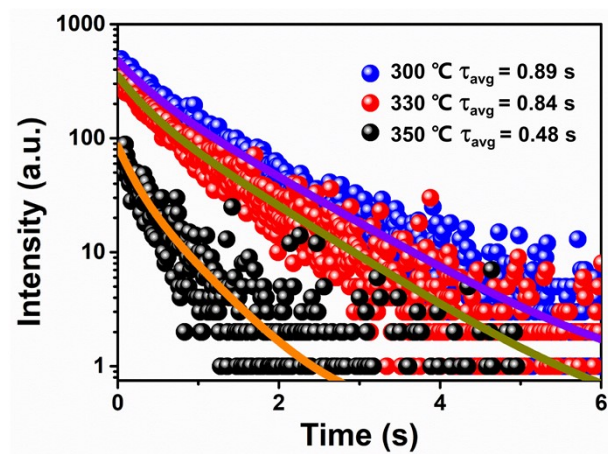

**Fig. S6** Time-resolved phosphorescence decay curves of BNDs(e) obtained at 300, 330 and 350 °C.

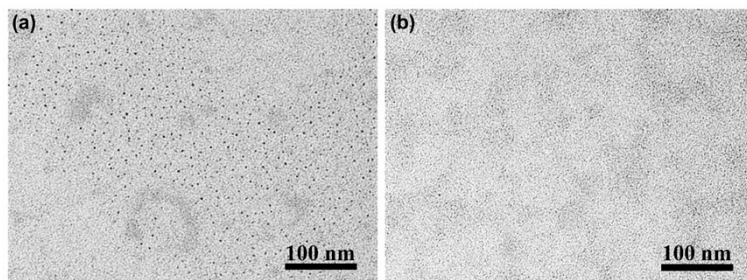

**Fig. S7** TEM images of (a) F-BNDs(p) and (b) F-BNDs(t).



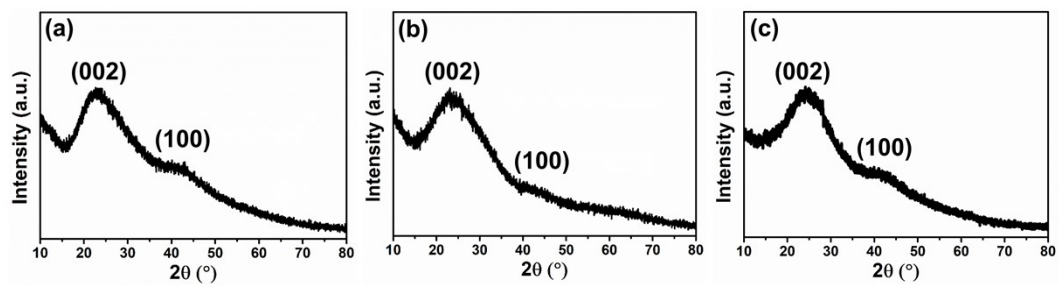

**Fig. S8** XRD patterns of (a) F-BNDs(e), (b) F-BNDs(p) and (c) F-BNDs(t).

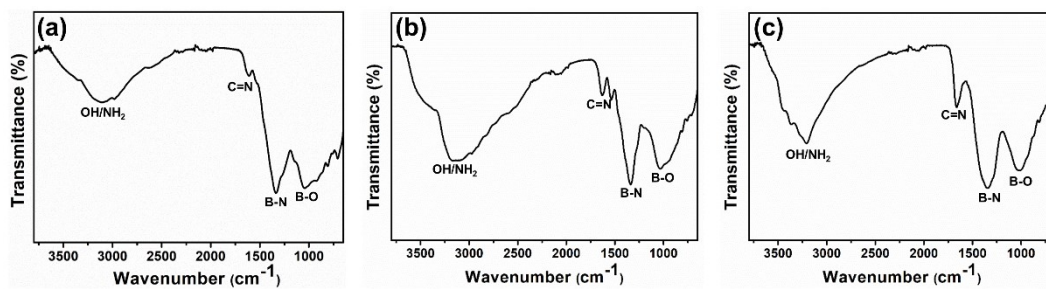

**Fig. S9** FTIR spectra of (a) F-BNDs(e), (b) F-BNDs(p) and (c) F-BNDs(t).

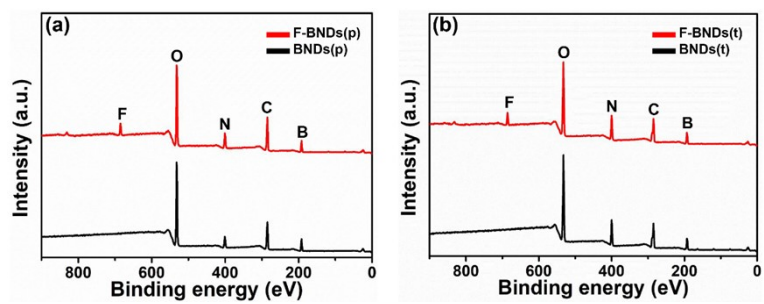

**Fig. S10** (a) The survey XPS spectra of F-BNDs(p) and BNDs(p). (b) The survey XPS spectra of F-BNDs(t) and BNDs(t).

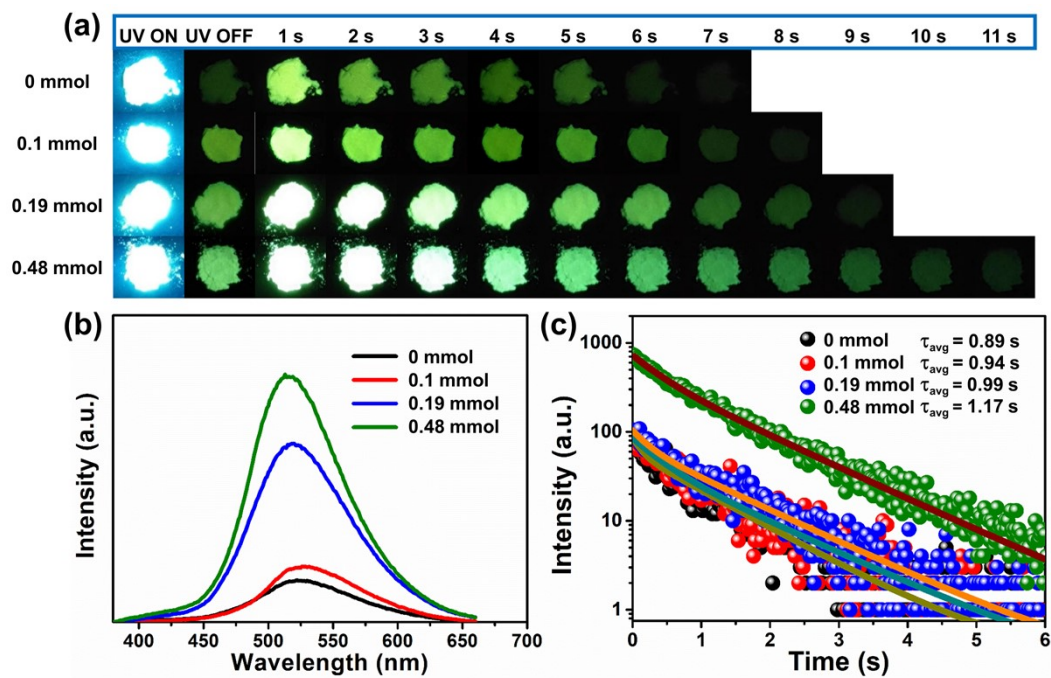

**Fig. S11** (a) The photographs of F-BNDs(e) with different fluorine contents taken after the stoppage of 405 nm excitation. (b) The RTP spectra under 360 nm excitation and (c) time-resolved phosphorescence decay curves of F-BNDs(e) with different fluorine contents

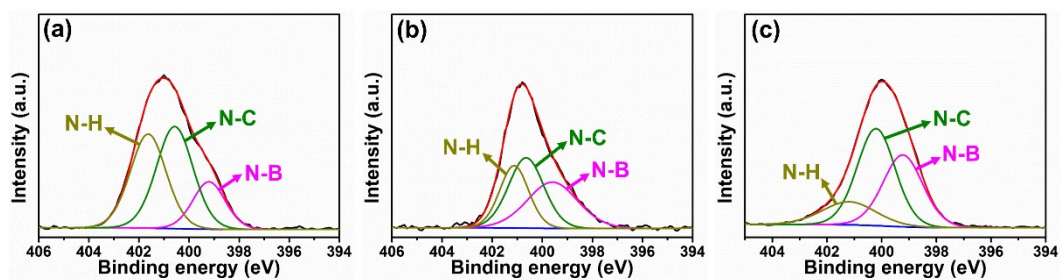

**Fig. S12** High-resolution N1s spectra of (a) F-BNDs(e), (b) F-BNDs(p) and (c) F-BNDs(t).

High-resolution spectrum of N 1s bands demonstrates three peaks in 399.2, 400.6 and 401.6 eV, which are attributed to N-B, N-C/N-O and N-H bonds,<sup>1, 2</sup> respectively. The N-H bond implies the presence of -NH<sub>2</sub> groups.

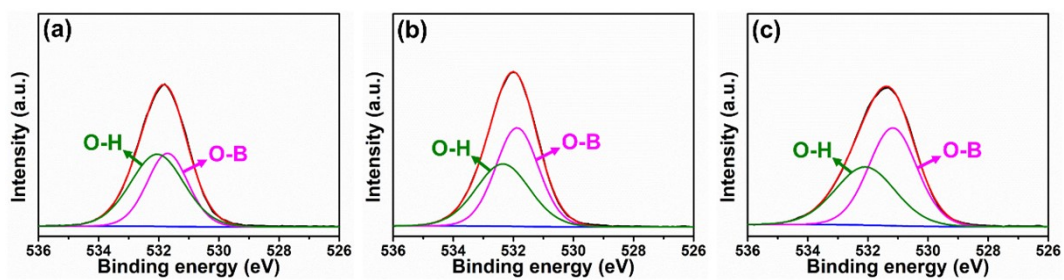

**Fig. S13** High-resolution O1s spectra of (a) F-BNDs(e), (b) F-BNDs(p) and (c) F-BNDs(t).

The high-resolution O1s spectra exhibit two peaks, including O-B at 531.7 and O-H at 532.1 eV.<sup>3</sup>

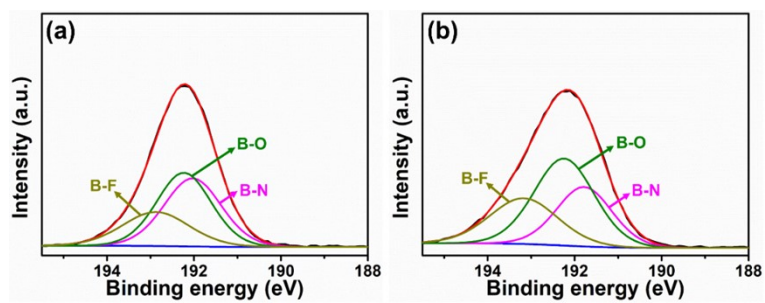

**Fig. S14** High-resolution B1s spectra of (a) F-BNDs(p) and (b) F-BNDs(t).

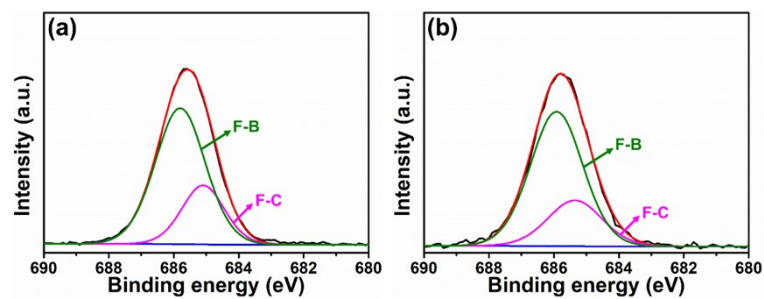

**Fig. S15** High-resolution F1s spectra of (a) F-BNDs(p) and (b) F-BNDs(t).

The high-resolution spectrum of F1s shows two peaks at 684.9 and 685.6 eV for F-C and F-B bonds,<sup>4,5</sup> respectively.



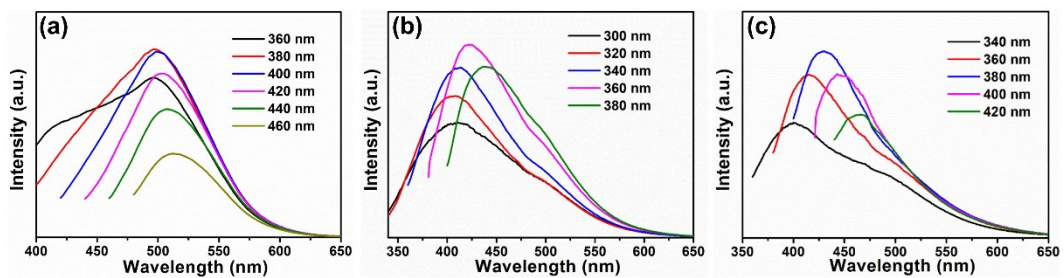

**Fig. S16** FL emission spectra excited at different wavelengths of (a) F-BNDs(e), (b) F-BNDs(p) and (c) F-BNDs(t).

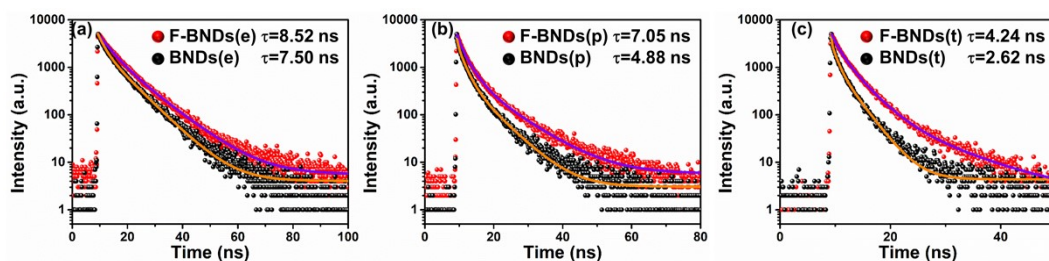

**Fig. S17** (a) Time-resolved FL decay curves of F-BNDs(e) and BNDs(e) under 380 nm excitation. (b) Time-resolved FL decay curves of F-BNDs(p) and BNDs(p) under 380 nm excitation. (c) Time-resolved FL decay curves of F-BNDs(t) and BNDs(t) under 340 nm excitation.

The FL decay spectra of three F-BNDs are fitted to give FL lifetimes of 8.52, 7.05, and 4.24 ns for F-BNDs(e), F-BNDs(p) and F-BNDs(t), respectively. It is worth noting that the FL lifetimes of BNDs(e), BNDs(t) and BNDs(p) are 7.50, 4.88 and 2.62 ns, which are shorter than corresponding F-BNDs, respectively. These results should be attributed to the effect of hydrogen-bond network, suppressing the non-radiative transitions. Higher  $-NH_2$  and  $-OH$  ratios are conducive to the formation of stronger inter- and intra-dot hydrogen-bond networks, exhibiting the longer FL and RTP lifetime.

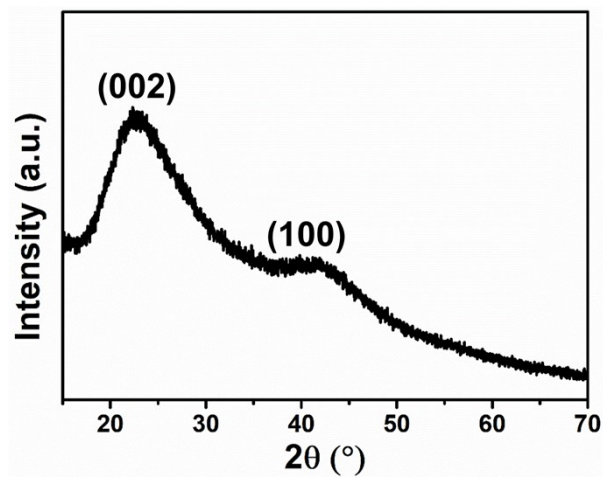

**Fig. S18** The XRD pattern of the F-BNDs(e) after treatment at 700 °C for 0.5 h in air condition.

The F-BNDs(e) were treated at 700 °C for 0.5 h in air condition. After that, most of the sample was maintained and the phase composition is consistent with that before heating, exhibiting excellent thermal stability.

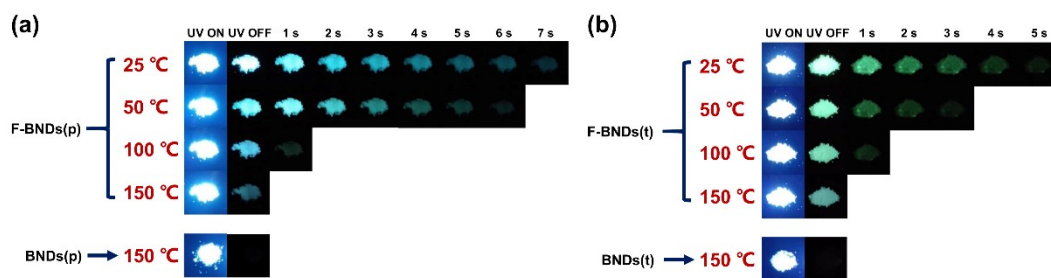

**Fig. S19** The photographs of (a) F-BNDs(p) and (b) F-BNDs(t) taken after the stoppage of 405 nm excitation by varying temperatures from 25 to 150 °C and photographs of corresponding BNDs taken at 150 °C.

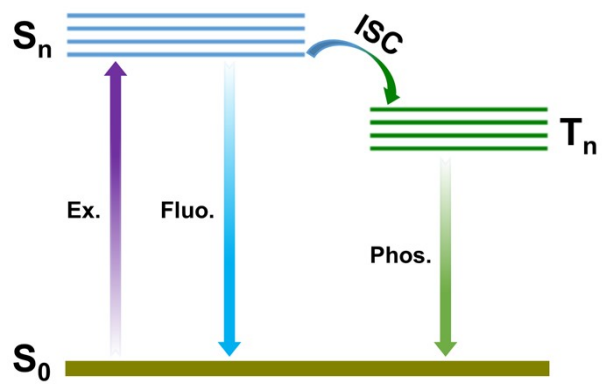

**Fig. S20** Schematic illustration of the RTP emission mechanisms of the F-BNDs.

**Tab. S1** Fitted parameters of the RTP decay curves of the F-BNDs and BNDs.

| Sample    | $\tau_1$ (s) | $\alpha_1$ (%) | $\tau_2$ (s) | $\alpha_2$ (%) | $\tau_{\text{avg}}$ (s) | $\emptyset$ |
|-----------|--------------|----------------|--------------|----------------|-------------------------|-------------|
| F-BNDs(e) | 0.393        | 15.48          | 1.222        | 84.52          | 1.175                   | 1.210       |
| F-BNDs(p) | 0.211        | 23.69          | 1.131        | 73.61          | 1.074                   | 1.176       |
| F-BNDs(t) | 0.055        | 42.51          | 0.415        | 57.49          | 0.383                   | 1.557       |
| BNDs(e)   | 0.051        | 1.67           | 0.896        | 98.33          | 0.895                   | 1.134       |
| BNDs(p)   | 0.148        | 29.25          | 0.553        | 70.75          | 0.513                   | 1.169       |
| BNDs(t)   | 0.021        | 63.50          | 0.129        | 36.50          | 0.106                   | 1.325       |

**Tab. S2** Phosphorescence lifetime comparison of some reported CD-based materials and F-BNDs.

| Samples          | Room-temperature Lifetime (ms) | High-temperature Lifetime (ms) | Ref.             |
|------------------|--------------------------------|--------------------------------|------------------|
| B-CDs@PAM        | 637                            | —                              | 6                |
| M-CDs            | 243                            | —                              | 7                |
| FNCDs            | 1140                           | —                              | 5                |
| NCDs             | 1060                           | —                              | 8                |
| CDs/PVP          | 476                            | —                              | 9                |
| CNDs             | 193                            | —                              | 10               |
| MP-CDs           | 880                            | —                              | 11               |
| FP-CDs           | 175                            | —                              | 12               |
| CD@PVA           | 292                            | —                              | 13               |
| CNDs             | 1387                           | —                              | 14               |
| FCNDs            | 1210                           | —                              | 15               |
| <b>F-BNDs(e)</b> | <b>1175</b>                    | <b>250 (150 °C)</b>            | <b>This work</b> |

**Tab. S3** The -NH<sub>2</sub> and -OH groups ratios of F-BNDs(e), F-BNDs(p) and F-BNDs(t) in N1s and O1s spectra.

| Samples   | -NH <sub>2</sub> (%) | -OH (%) |
|-----------|----------------------|---------|
| F-BNDs(e) | 36.71                | 56.35   |
| F-BNDs(p) | 27.29                | 44.18   |
| F-BNDs(t) | 15.94                | 43.52   |



## **Supplementary video S1**

The video S1 demonstrates that the F-BNDs(e) powder could emit green room temperature phosphorescence after the stoppage of 405 nm excitation, lasting over 10 s by the naked eyes.

## References

1. M. Liu, Y. Xu, Y. Wang, X. Chen, X. Ji, F. Niu, Z. Song and J. Liu, *Adv. Opt. Mater.*, 2017, **5**, 1600661.
2. S. Angizi, F. Shayeganfar, M. H. Azar and A. Simchi, *Ceram. Int.*, 2020, **46**, 978-985.
3. S. Han, G. Lian, X. Zeng, Z. Cao, Q. Wang, D. Cui and C.-P. Wong, *Nano Res.*, 2020, **13**, 3261-3267.
4. A. Meiyazhagan, P. Serles, D. Salpekar, E. F. Oliveira, L. B. Alemany, R. Fu, G. Gao, T. Arif, R. Vajtai, V. Swaminathan, D. S. Galvao, V. N. Khabashesku, T. Filleter and P. M. Ajayan, *Adv. Mater.*, 2021, **33**, e2106084.
5. F. Liu, Z. Li, Y. Li, Y. Feng and W. Feng, *Carbon*, 2021, **181**, 9-15.
6. H. y. Wang, L. Zhou, H. m. Yu, X. d. Tang, C. Xing, G. Nie, H. Akafzade, S. y. Wang and W. Chen, *Adv. Opt. Mater.*, 2022, **10**, 2200678.
7. J. Bai, G. Yuan, X. Chen, L. Zhang, Y. Zhu, X. Wang and L. Ren, *Adv. Sci. (Weinh)*, 2022, **9**, e2104278.
8. Q. Li, M. Zhou, Q. Yang, Q. Wu, J. Shi, A. Gong and M. Yang, *Chem. Mater.*, 2016, **28**, 8221-8227.
9. Y. Liu, M. Al-Salihi, Y. Guo, R. Ziniuk, S. Cai, L. Wang, Y. Li, Z. Yang, D. Peng, K. Xi, Z. An, X. Jia, L. Liu, W. Yan and J. Qu, *Light Sci. Appl.*, 2022, **11**, 163.
10. S.-Y. Song, L.-Z. Sui, K.-K. Liu, Q. Cao, W.-B. Zhao, Y.-C. Liang, C.-F. Lv, J.-H. Zang, Y. Shang, Q. Lou, X.-G. Yang, L. Dong, K.-J. Yuan and C.-X. Shan, *Nano Res.*, 2021, **14**, 2231-2240.
11. K. Jiang, S. Hu, Y. Wang, Z. Li and H. Lin, *Small*, 2020, **16**, e2001909.
12. B. Zhao, R. Yu, K. Xu, C. Zou, H. Ma, S. Qu and Z. a. Tan, *J. Mater. Chem. C*, 2021, **9**, 15577-15582.
13. X. Bao, E. V. Ushakova, E. Liu, Z. Zhou, D. Li, D. Zhou, S. Qu and A. L. Rogach, *Nanoscale*, 2019, **11**, 14250-14255.
